# Supplementary material
Source: PubMed Central journal article supplement (PMC3668498)

## SUPPLEMENTARY FIGURE LEGENDS

### **Figure S1. Phenotypic differences between ADSC-PL, BMMSC-PL, and BMMSC-FCS.**

(A) Thawed MSC were collected at the end of P2 and stained with appropriate antibodies (grey histogram) or isotype-matched controls (black histogram). One representative example of each MSC subtype is depicted (B) The global expression of NK activating ligands on resting MSC (n=15) was obtained by combining the individual rMFI from MICA/B, ULBP1, ULBP2, ULBP3, CD112, and CD155. This activating profile was then analyzed compared to the level of expression of HLA-ABC, the main NK inhibitory ligand.\* P<0.05; \*\* P<0.01.

### **Figure S2. Phenotypic modifications induced on MSC by inflammatory stimuli.**

MSC were stimulated or not at the end of P2 by 100 UI/mL IFN- $\gamma$  and 15 ng/mL TNF- $\alpha$  for 40 hours before staining with specific antibodies or isotype-matched controls to determine the ratio of mean fluorescence intensity (rMFI). (A) Inducible markers are expressed as the rMFI fold change compared to untreated MSC (UT). (B) Phenotypic differences between primed ADSC-PL (pADSC-PL), pBMMSC-PL, and pBMMSC-FCS were shown as rMFI. Each symbol represents a different MSC batch. Bars: median. \* P<0.05; \*\* P<0.01.

### **Figure S3. IDO is involved in the inhibition of T-cell proliferation by pMSC unlike NOS and PGE2**

Primed MSC were cocultured at 10T/1MSC ratio with CFSE-labelled purified T cells stimulated with anti-CD3/anti-CD28 antibodies in the presence or not of L-N-monomethylarginin (L-NMMA), L-1-methyltryptophan (L-1MT), or NS398 to inhibit NOS, IDO-1, or Cox-2 activity; respectively. T-cell proliferation was evaluated at day 6 and data are expressed relatively to T cells alone (assigned to 100%). Results are those of one representative experiment out of 3.

# Supplementary Figure 1

**A.**

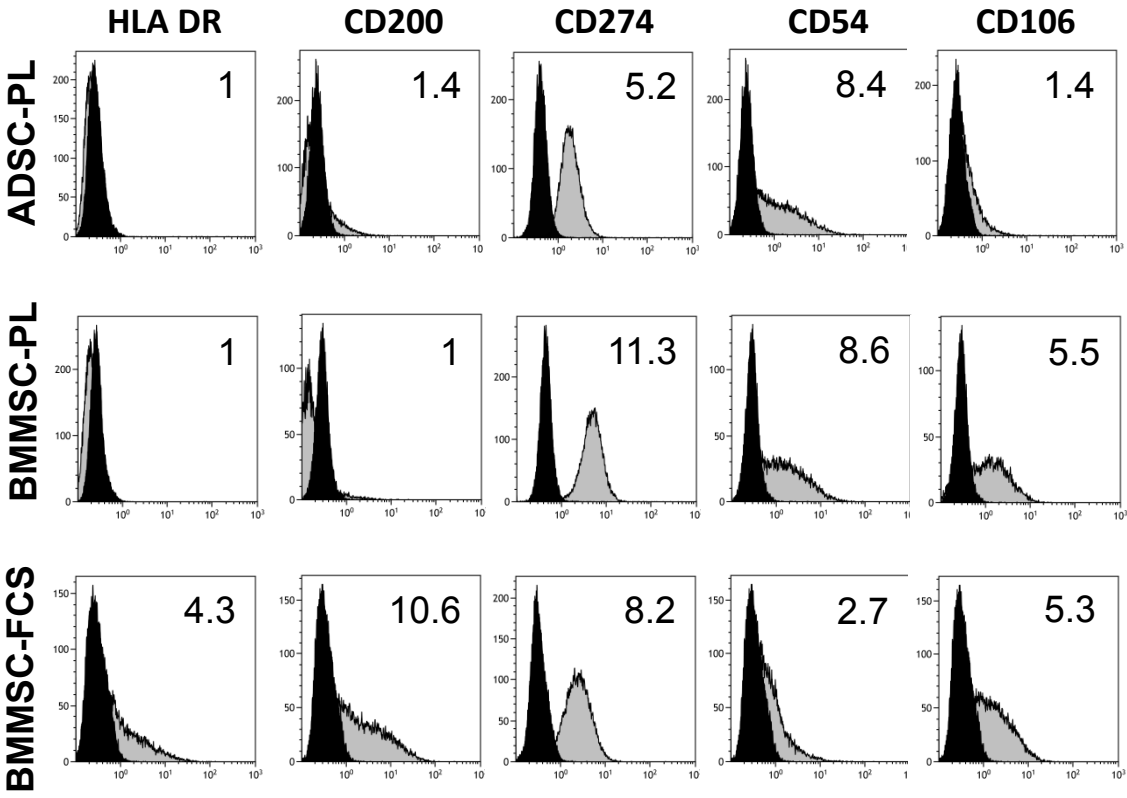

**B.**

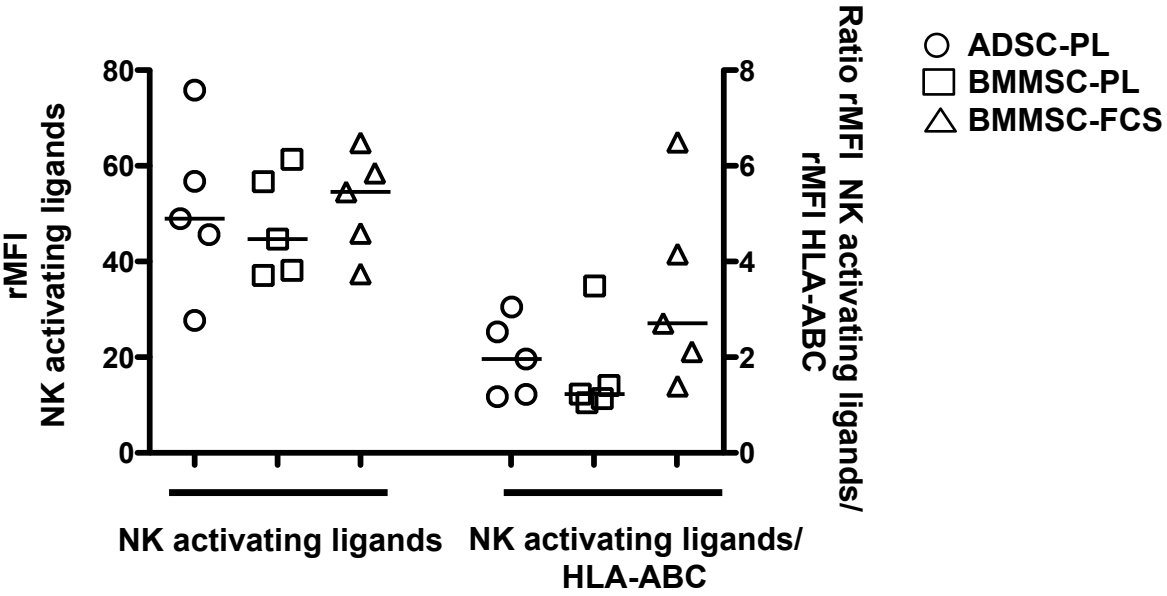

# Supplementary Figure 2

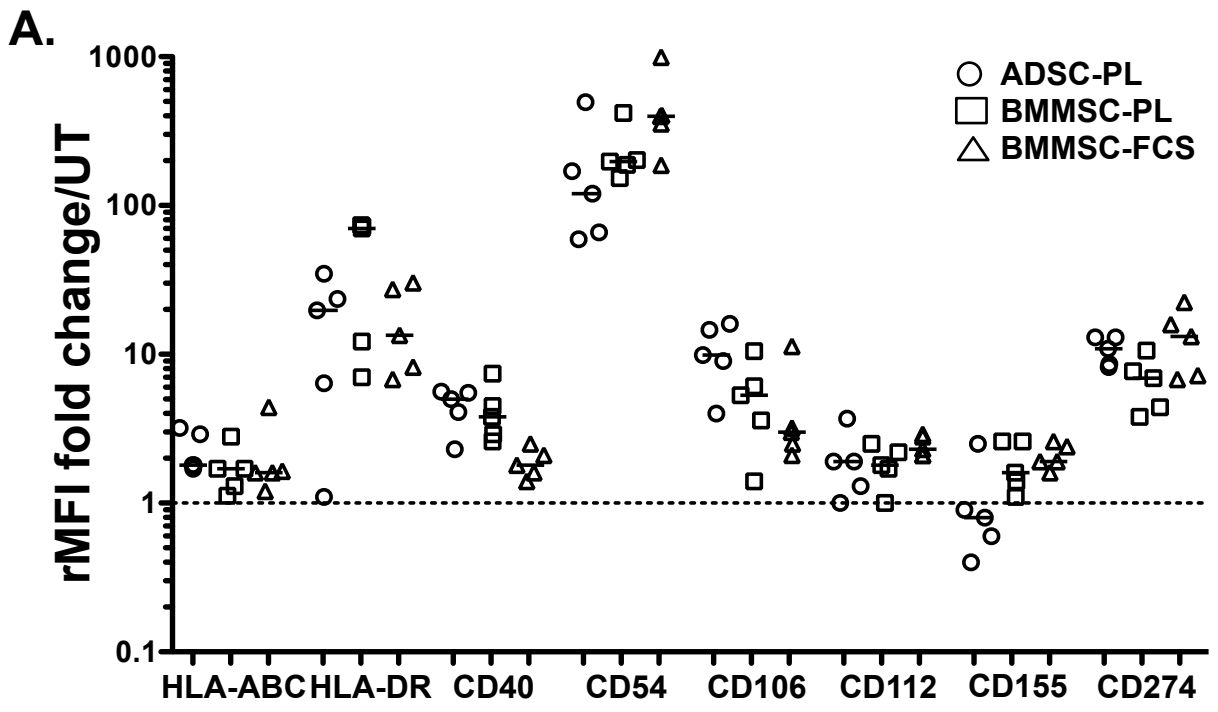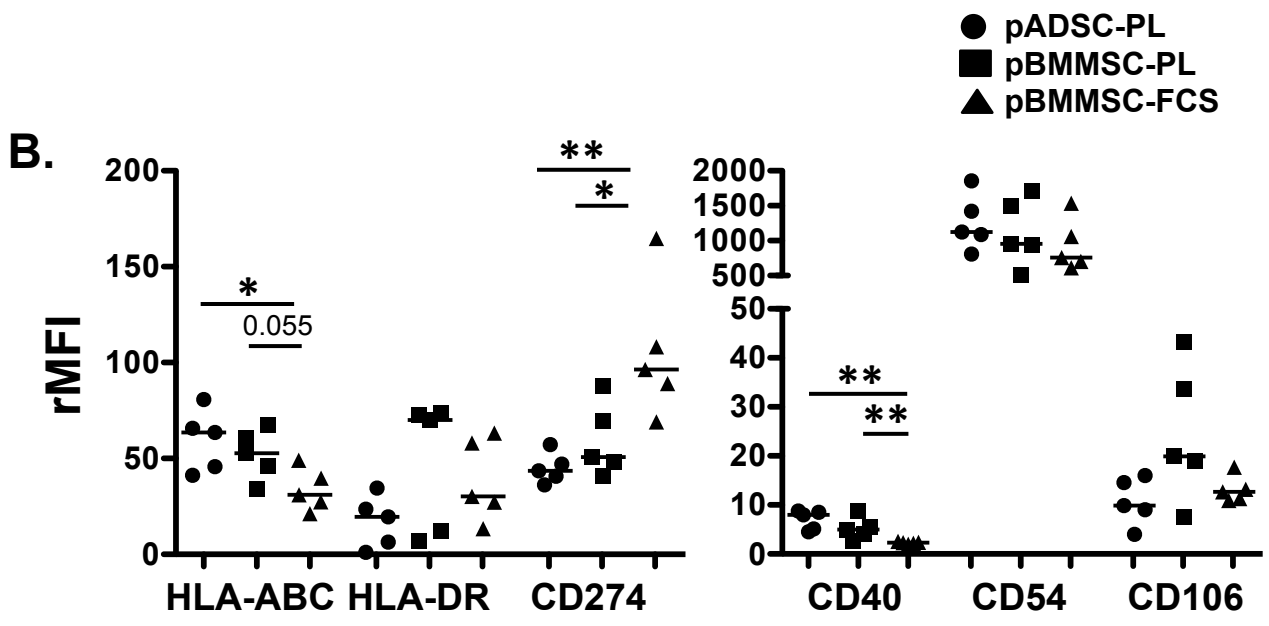

# Supplementary Figure 3

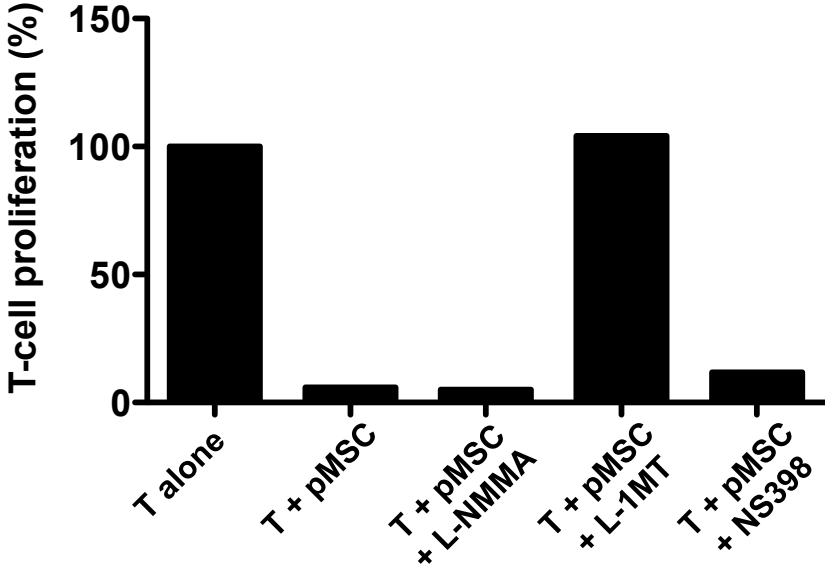

Supplement: Supp_Figs.pdf [file Supp_Figs.pdf]
